# Supplementary material for: Crystal structure, magnetic properties and theoretical study of a bithiazolebis(oxamate)-containing [NiII3] helicate
Source: Royal Society of Chemistry journal article supplement (doi:10.1039/d3nj04701f), 2024-01-01
Supplement: d3nj04701f1.pdf [file d3nj04701f1.pdf]

## Electronic Supplementary Information (ESI) for

### Crystal Structure, Magnetic Properties and Theoretical Study of a Bithiazolebis(oxamate)- containing [Ni<sup>II</sup><sub>3</sub>] Helicate

Lucas H. G. Kalinke,<sup>†</sup> Mariany S. Silva,<sup>§</sup> Renato Rabelo,<sup>§,‡</sup> Ana K. Valdo,<sup>#</sup> Felipe T. Martins,<sup>§</sup> Nicolás Moliner,<sup>‡</sup> Miguel Julve,<sup>‡</sup> Francesc Lloret,<sup>‡</sup> Joan Cano<sup>\*,‡</sup> and Danielle Cangussu<sup>\*,§</sup>

<sup>†</sup>*Instituto Federal de Goiás, IFG-Câmpus Anápolis, Anápolis, GO, 75131-457, Brazil*

<sup>§</sup>*Universidade Federal de Goiás, Instituto de Química, Goiânia, GO, 74001-970, Brazil*

<sup>#</sup>*Instituto Federal Goiano, IF Goiano – Campus Iporá, Iporá, GO, 76200-000, Brazil*

<sup>‡</sup>*Departament de Química Inorgànica/Instituto de Ciencia Molecular (ICMol), 46980 C/ Catedrático José Beltrán 2, 46980 Paterna (Valencia), Spain*

#### Table of contents

|                                                                        |     |
|------------------------------------------------------------------------|-----|
| Infrared Spectra (Fig. S1).....                                        | S2  |
| Thermogravimetric Analysis (Fig. S2).....                              | S3  |
| Powder X-Ray diffractograms (Fig. S3).....                             | S4  |
| Crystallographic Data and Analysis (Tables S1-S4 and Figs. S4-S6)..... | S5  |
| Magnetic Data and Analysis (Tables S5, S6 and Figs. S7, S8).....       | S12 |

## Infrared Spectra

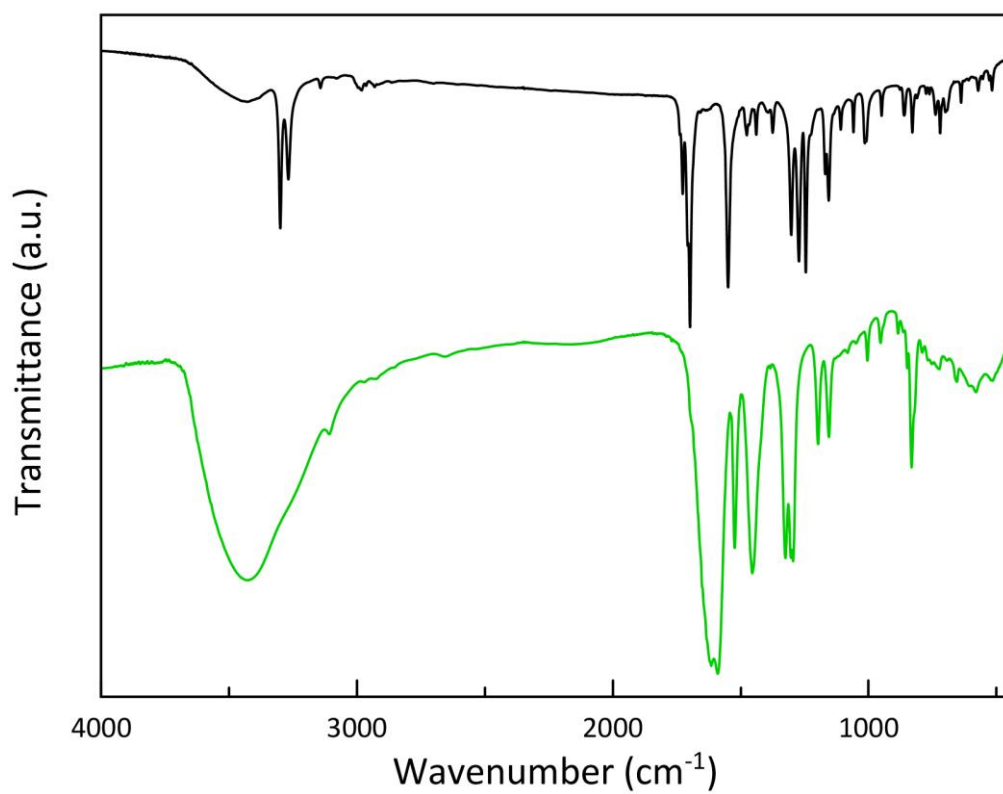

**Figure S1.** FT-IR spectra of **1** (green), and H<sub>2</sub>Et<sub>2</sub>dabtzoX proligand (black).

## Thermogravimetric Analysis

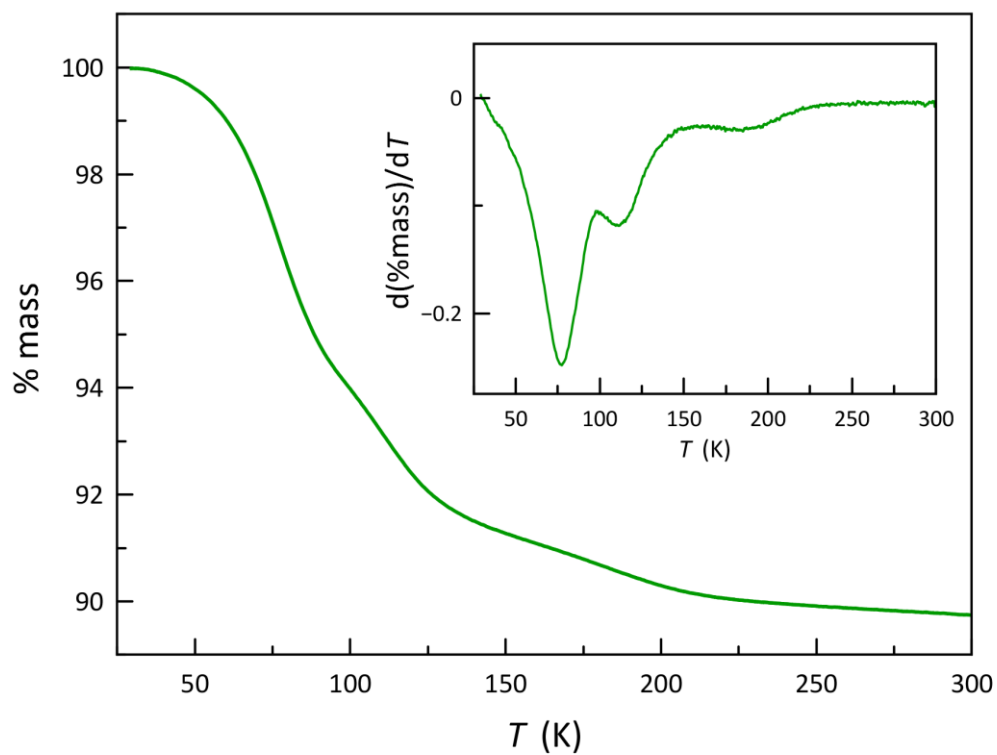

**Figure S2.** TGA profile of **1** (green) under N<sub>2</sub> atmosphere. The inset shows the first derivative of the TGA curve.

## Powder X-Ray diffractograms

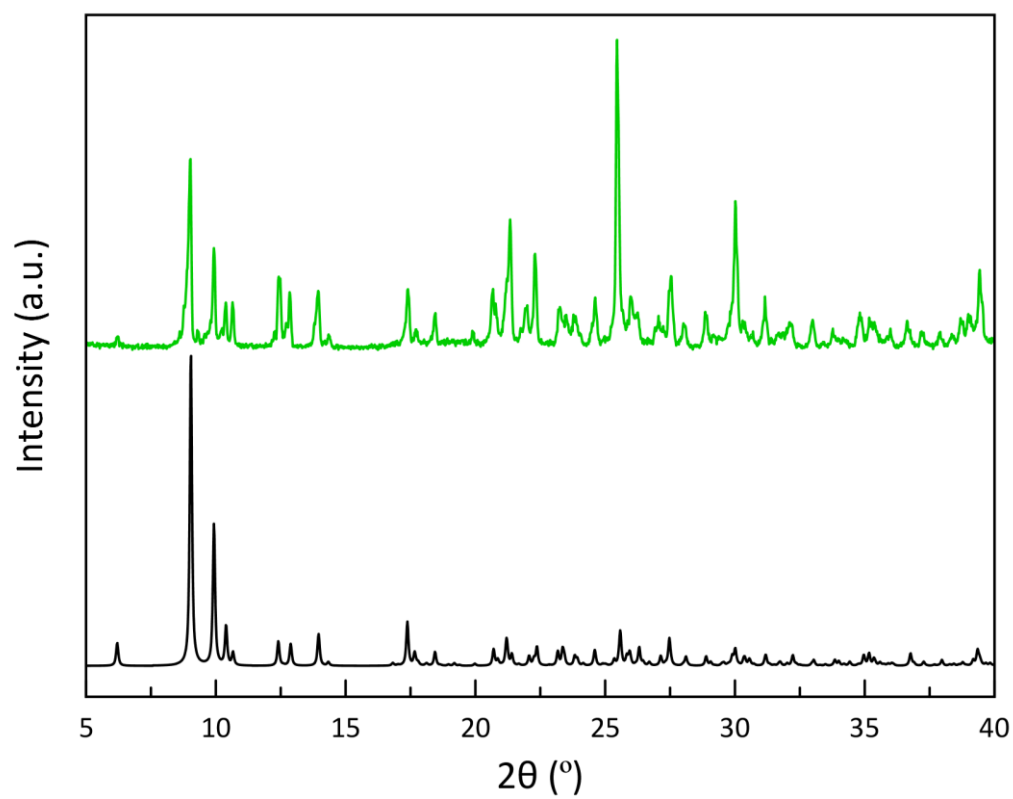

**Figure S3.** Experimental (green) powder X-ray diffractogram pattern and the calculated one (black) for **1**.

## Crystallographic Data and Analysis

**Table S1.** Selected bond lengths (Å) for **1\***.

|                      |           |                      |           |
|----------------------|-----------|----------------------|-----------|
| Ni1—N1               | 2.053 (4) | Na1—O2v              | 2.382 (4) |
| Ni1—N4 <sup>i</sup>  | 2.041 (4) | Na1—O2 <sup>vi</sup> | 2.551 (5) |
| Ni1—N5               | 2.099 (4) | Na1—O8               | 2.329 (6) |
| Ni1—O1               | 2.082 (4) | Na1—O9               | 2.455 (5) |
| Ni1—O5 <sup>i</sup>  | 2.070 (4) | Na1—O3W              | 2.381 (6) |
| Ni1—O7               | 2.069 (4) | Na2—O4 <sup>i</sup>  | 2.541 (5) |
| Ni2—N2               | 2.112 (4) | Na2—O5 <sup>i</sup>  | 2.494 (5) |
| Ni2—N2 <sup>i</sup>  | 2.112 (4) | Na2—O7 <sup>vi</sup> | 2.428 (5) |
| Ni2—N3               | 2.118 (4) | Na2—O8 <sup>vi</sup> | 2.939 (6) |
| Ni2—N3 <sup>i</sup>  | 2.118 (4) | Na2—O1W              | 2.400 (6) |
| Ni2—N6               | 2.141 (4) | Na2—O2W              | 2.328 (7) |
| Ni2—N6 <sup>i</sup>  | 2.141 (4) | Na2—O3W              | 2.607 (6) |
| Ni1i—N1 <sup>i</sup> | 2.053 (4) | Na3—O2 <sup>ii</sup> | 2.422 (5) |
| Ni1i—N4              | 2.041 (4) | Na3—O3 <sup>ii</sup> | 2.456 (4) |
| Ni1i—N5 <sup>i</sup> | 2.099 (4) | Na3—O4               | 2.343 (5) |
| Ni1i—O1 <sup>i</sup> | 2.082 (4) | Na3—O6               | 2.455 (5) |
| Ni1i—O5              | 2.070 (4) | Na3—O4W              | 2.324 (8) |
| Ni1i—O7 <sup>i</sup> | 2.069 (4) | Na3—O5W              | 2.473 (6) |

\*Symmetry code: (i) = 1-x, y, 1/2-z; (ii) = 1-x, y-1, 1/2-z; (v) = x, 1-y, 1/2+z; (vi) = 1/2-x, y-1/2, 1/2-z.

**Table S2.** Selected bond angles (deg) for **1**

|                                      |             |                                        |            |
|--------------------------------------|-------------|----------------------------------------|------------|
| N1—Ni1—N4 <sup>i</sup>               | 101.9 (2)   | O2 <sup>v</sup> —Na1—O8                | 126.9 (2)  |
| N1—Ni1—N5                            | 102.1 (2)   | O2 <sup>v</sup> —Na1—O9                | 106.4 (2)  |
| N1—Ni1—O1                            | 78.7 (2)    | O2 <sup>v</sup> —Na1—O3W               | 128.8 (2)  |
| N1—Ni1—O5 <sup>i</sup>               | 169.3 (2)   | O2 <sup>vi</sup> —Na1—O8               | 102.7 (2)  |
| N1—Ni1—O7                            | 90.9 (2)    | O2 <sup>vi</sup> —Na1—O9               | 165.5 (2)  |
| N4 <sup>i</sup> —Ni1—N5              | 96.5 (2)    | O2 <sup>vi</sup> —Na1—O3W              | 91.2 (2)   |
| N4 <sup>i</sup> —Ni1—O1              | 90.8 (2)    | O8—Na1—O9                              | 69.0 (2)   |
| N4 <sup>i</sup> —Ni1—O5 <sup>i</sup> | 80.1 (2)    | O8—Na1—O3W                             | 103.2 (2)  |
| N4 <sup>i</sup> —Ni1—O7              | 167.1 (2)   | O9—Na1—O3W                             | 79.7 (2)   |
| N5—Ni1—O1                            | 172.3 (2)   | O4 <sup>i</sup> —Na2—O5 <sup>i</sup>   | 52.14 (13) |
| N5—Ni1—O5 <sup>i</sup>               | 88.0 (2)    | O4 <sup>i</sup> —Na2—O7 <sup>vi</sup>  | 114.9 (2)  |
| N5—Ni1—O7                            | 79.2 (2)    | O4 <sup>i</sup> —Na2—O8 <sup>vi</sup>  | 71.08 (14) |
| O1—Ni1—O5 <sup>i</sup>               | 90.8 (2)    | O4 <sup>i</sup> —Na2—O1W               | 144.7 (2)  |
| O1—Ni1—O7                            | 93.1 (2)    | O4 <sup>i</sup> —Na2—O2W               | 85.4 (2)   |
| O5 <sup>i</sup> —Ni1—O7              | 87.5 (2)    | O4 <sup>i</sup> —Na2—O3W               | 92.7 (2)   |
| N2—Ni2—N3                            | 78.62 (16)  | O5 <sup>i</sup> —Na2—O7 <sup>vi</sup>  | 162.8 (2)  |
| N2—Ni2—N6                            | 92.90 (17)  | O5 <sup>i</sup> —Na2—O8 <sup>vi</sup>  | 122.9 (2)  |
| N2—Ni2—N2 <sup>i</sup>               | 95.2 (2)    | O5 <sup>i</sup> —Na2—O1W               | 92.6 (2)   |
| N2—Ni2—N3 <sup>i</sup>               | 96.25 (16)  | O5 <sup>i</sup> —Na2—O2W               | 90.9 (2)   |
| N2—Ni2—N6 <sup>i</sup>               | 168.80 (16) | O5 <sup>i</sup> —Na2—O3W               | 92.5 (2)   |
| N3—Ni2—N6                            | 92.94 (17)  | O7 <sup>vi</sup> —Na2—O8 <sup>vi</sup> | 47.84 (14) |
| N3—Ni2—N2 <sup>i</sup>               | 96.25 (16)  | O7 <sup>vi</sup> —Na2—O1W              | 99.9 (2)   |

|                                                    |             |                                        |            |
|----------------------------------------------------|-------------|----------------------------------------|------------|
| N3—Ni2—N3 <sup>i</sup>                             | 172.5 (2)   | O7 <sup>vi</sup> —Na2—O2W              | 99.6 (2)   |
| N3—Ni2—N6 <sup>i</sup>                             | 92.81 (17)  | O7 <sup>vi</sup> —Na2—O3W              | 75.9 (2)   |
| N6—Ni2—N2 <sup>i</sup>                             | 168.81 (16) | O8 <sup>vi</sup> —Na2—O1W              | 143.6 (2)  |
| N6—Ni2—N3 <sup>i</sup>                             | 92.81 (17)  | O8 <sup>vi</sup> —Na2—O2W              | 77.8 (2)   |
| N6—Ni2—N6 <sup>i</sup>                             | 80.3 (2)    | O8 <sup>vi</sup> —Na2—O3W              | 96.0 (2)   |
| N2i—Ni2—N3 <sup>i</sup>                            | 78.62 (16)  | O1W—Na2—O2W                            | 95.2 (2)   |
| N2 <sup>i</sup> —Ni2—N6 <sup>i</sup>               | 92.90 (17)  | O1W—Na2—O3W                            | 89.7 (2)   |
| N3 <sup>i</sup> —Ni2—N6 <sup>i</sup>               | 92.95 (17)  | O2W—Na2—O3W                            | 173.9 (2)  |
| N1 <sup>i</sup> —Ni1 <sup>i</sup> —N4              | 101.9 (2)   | O2 <sup>ii</sup> —Na3—O3 <sup>ii</sup> | 69.11 (14) |
| N1 <sup>i</sup> —Ni1 <sup>i</sup> —N5              | 102.1 (2)   | O2 <sup>ii</sup> —Na3—O4               | 117.9 (2)  |
| N1 <sup>i</sup> —Ni1 <sup>i</sup> —O1 <sup>i</sup> | 78.7 (2)    | O2 <sup>ii</sup> —Na3—O6               | 172.0 (2)  |
| N1 <sup>i</sup> —Ni1 <sup>i</sup> —O5              | 169.3 (2)   | O2 <sup>ii</sup> —Na3—O4W              | 89.3 (3)   |
| N1 <sup>i</sup> —Ni1 <sup>i</sup> —O7 <sup>i</sup> | 90.9 (2)    | O2 <sup>ii</sup> —Na3—O5W              | 84.6 (2)   |
| N4—Ni1 <sup>i</sup> —N5 <sup>i</sup>               | 96.5 (2)    | O3 <sup>ii</sup> —Na3—O4               | 90.5 (2)   |
| N4—Ni1 <sup>i</sup> —O1 <sup>i</sup>               | 90.8 (2)    | O3 <sup>ii</sup> —Na3—O6               | 112.0 (2)  |
| N4—Ni1 <sup>i</sup> —O5                            | 80.1 (2)    | O3 <sup>ii</sup> —Na3—O4W              | 95.9 (3)   |
| N4—Ni1 <sup>i</sup> —O7 <sup>i</sup>               | 167.1 (2)   | O3 <sup>ii</sup> —Na3—O5W              | 141.4 (2)  |
| N5 <sup>i</sup> —Ni1 <sup>i</sup> —O1 <sup>i</sup> | 172.3 (2)   | O4—Na3—O6                              | 70.1 (2)   |
| N5 <sup>i</sup> —Ni1 <sup>i</sup> —O5              | 88.0 (2)    | O4—Na3—O4W                             | 152.4 (3)  |
| N5 <sup>i</sup> —Ni1 <sup>i</sup> —O7 <sup>i</sup> | 79.2 (2)    | O4—Na3—O5W                             | 77.0 (2)   |
| O1 <sup>i</sup> —Ni1 <sup>i</sup> —O5              | 90.8 (2)    | O6—Na3—O4W                             | 82.7 (3)   |
| O1 <sup>i</sup> —Ni1 <sup>i</sup> —O7 <sup>i</sup> | 93.1 (2)    | O6—Na3—O5W                             | 98.0 (2)   |
| O5—Ni1 <sup>i</sup> —O7 <sup>i</sup>               | 87.5 (2)    | O4W—Na3—O5W                            | 112.1 (3)  |

O2<sup>v</sup>—Na1—O2<sup>vi</sup> 88.0 (2)

\*Symmetry code: (i) = 1-x, y, 1/2-z; (ii) = 1-x, y-1, 1/2-z; (v) = x, 1-y, 1/2+z; (vi) = 1/2-x, y-1/2, 1/2-z.

**Table S3.** Metrics for the hydrogen bonds in **1** (D and A state for donor and acceptor atoms, respectively).

| D-A groups/molecule | <b>1</b>                    |      |      |          |     |
|---------------------|-----------------------------|------|------|----------|-----|
| water-oxamate       | O1W-H1W...O8                | 0.99 | 2.00 | 2.945(7) | 158 |
| water-oxamate       | O1W-H2W...O3 <sup>vi</sup>  | 1.00 | 2.01 | 2.899(7) | 148 |
| water-water         | O2W-H3W...O5W <sup>x</sup>  | 0.99 | 2.02 | 2.840(9) | 138 |
| water-oxamate       | O2W-H4W...O6 <sup>x</sup>   | 1.00 | 1.91 | 2.904(7) | 172 |
| water-oxamate       | O3W-H5W...O1 <sup>vi</sup>  | 0.99 | 1.98 | 2.945(7) | 163 |
| water-water         | O3W-H6W...O1W <sup>vi</sup> | 0.99 | 2.00 | 2.971(8) | 168 |
| water-oxamate       | O4W-H7W...S3 <sup>ix</sup>  | 0.85 | 2.77 | 3.52()   | 148 |
| water-oxamate       | O4W-H8W...O9 <sup>ix</sup>  | 0.85 | 2.29 | 2.83()   | 122 |
| water-oxamate       | O5W-H9W...O1                | 0.99 | 1.90 | 2.782(6) | 146 |
| water-oxamate       | O5W-H10W...O8 <sup>ix</sup> | 0.85 | 2.18 | 3.001(8) | 163 |

\*Symmetry code: (vi) = 1/2-x, y-1/2, 1/2-z; (ix) = 1-x, -y, 1-z; (x) = x-1/2, 1/2-y, z-1/2.



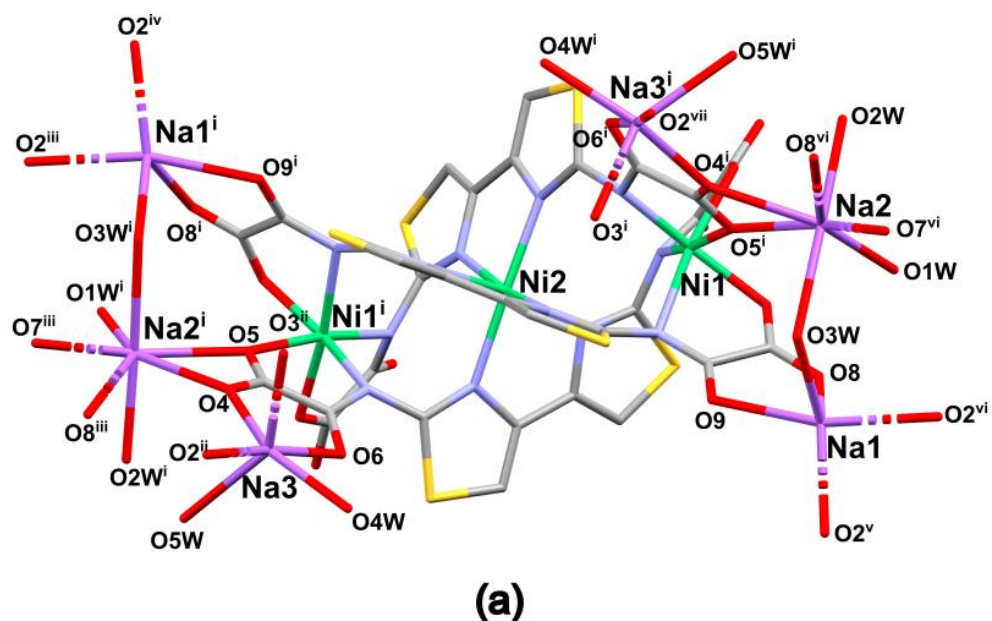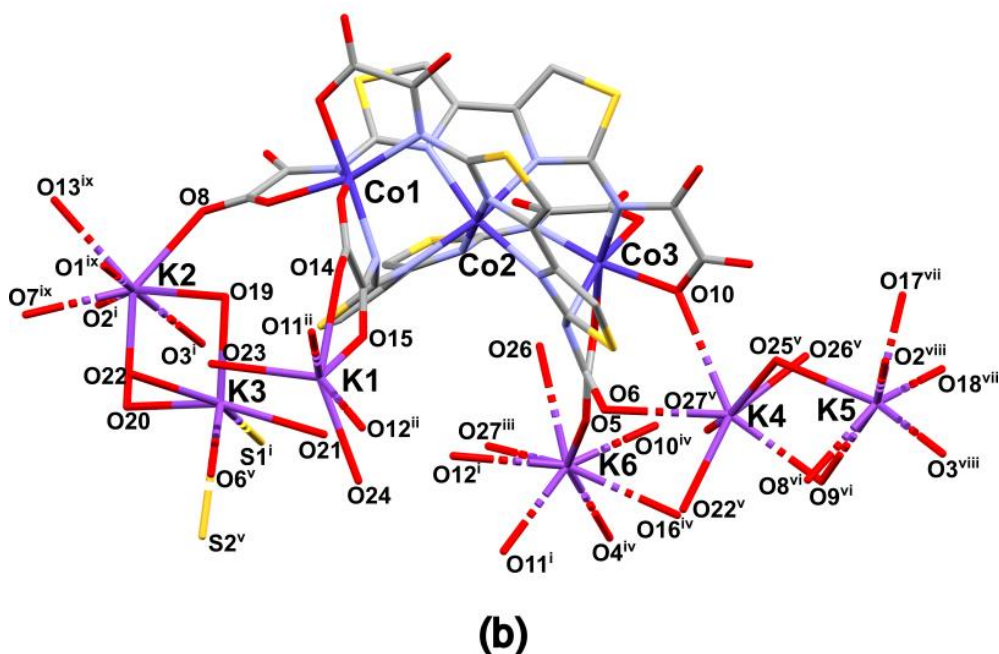

**Figure S4.** Perspective views of **1** (a) and **2** (b) showing the complete coordination sphere for the involved metal ions. All non-hydrogen atoms were drawn at the 50% probability level and the hydrogen atoms were omitted for clarity [Symmetry code: **1** (i) = 1-x, y, ½-z; (ii) = 1-x, y-1, ½-z; (iii) = ½+x, y-½, z; (iv) = 1-x, 1-y, -z; (v) = x, 1-y, ½+z; (vi) = ½-x, y-½, ½-z; (vii) = x, y-1, z. **2** (i) = x, 1+y, z; (ii) = 1-x, -y, 1-z; (iii) = ½+x, 1.5-y, z-½; (iv) = 1.5-x, ½+y, ½-z; (v) = 1-x, 1-y, 1-z; (vi) = x-½, ½-y, ½-z; (vii) = 1.5-x, y-½, ½-z; v(iii) = x-½, y-½, z-½; (ix) = 1.5-x, ½+y, 1.5-z].

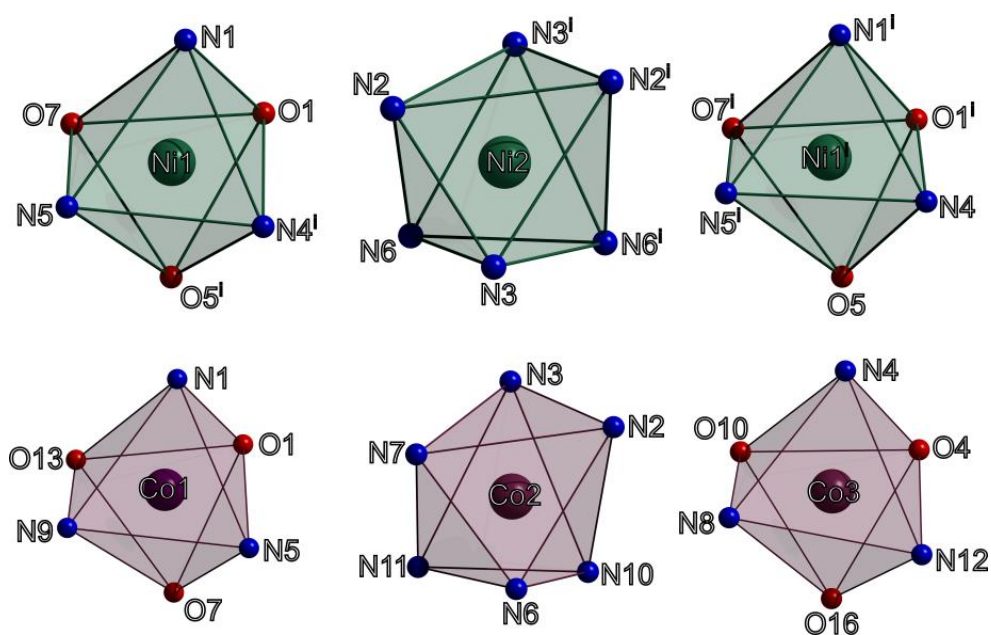

**Figure S5.** Coordination polyhedra of Ni<sup>II</sup> (top) and Co<sup>II</sup> (bottom) ions in **1** and **2**, respectively [Symmetry code (i) = 1-x, y, ½-z].

**Table S4.** Analyses of the coordination geometry for each M<sup>II</sup> ion in the structures of **1** (M = Ni) and **2** (M = Co) in The SHAPE program<sup>1</sup> was used to calculate the deviation parameter in relation to each idealized coordinated geometry.

| Deviation parameters calculated with SHAPE |        |        |        |        |        |
|--------------------------------------------|--------|--------|--------|--------|--------|
| SHAPE code <sup>a</sup>                    | Ni1    | Ni2    | Co1    | Co2    | Co3    |
| OC-6                                       | 22.626 | 16.715 | 17.776 | 17.806 | 17.548 |
| TPR-6                                      | 26.684 | 22.656 | 22.351 | 23.411 | 23.388 |

<sup>a</sup>OC-6: O<sub>h</sub>, octahedron; TPR-6: D<sub>3h</sub>, trigonal prism.

<sup>1</sup> Alvarez, S.; Alemany, P.; Casanova, D.; Cirrea, J.; Llunell, M.; Avnir, D. Shape Maps and Polyhedral Interconversion Paths in Transition Metal Chemistry. *Coord. Chem. Rev.* **2005**, *249*, 1693–1708

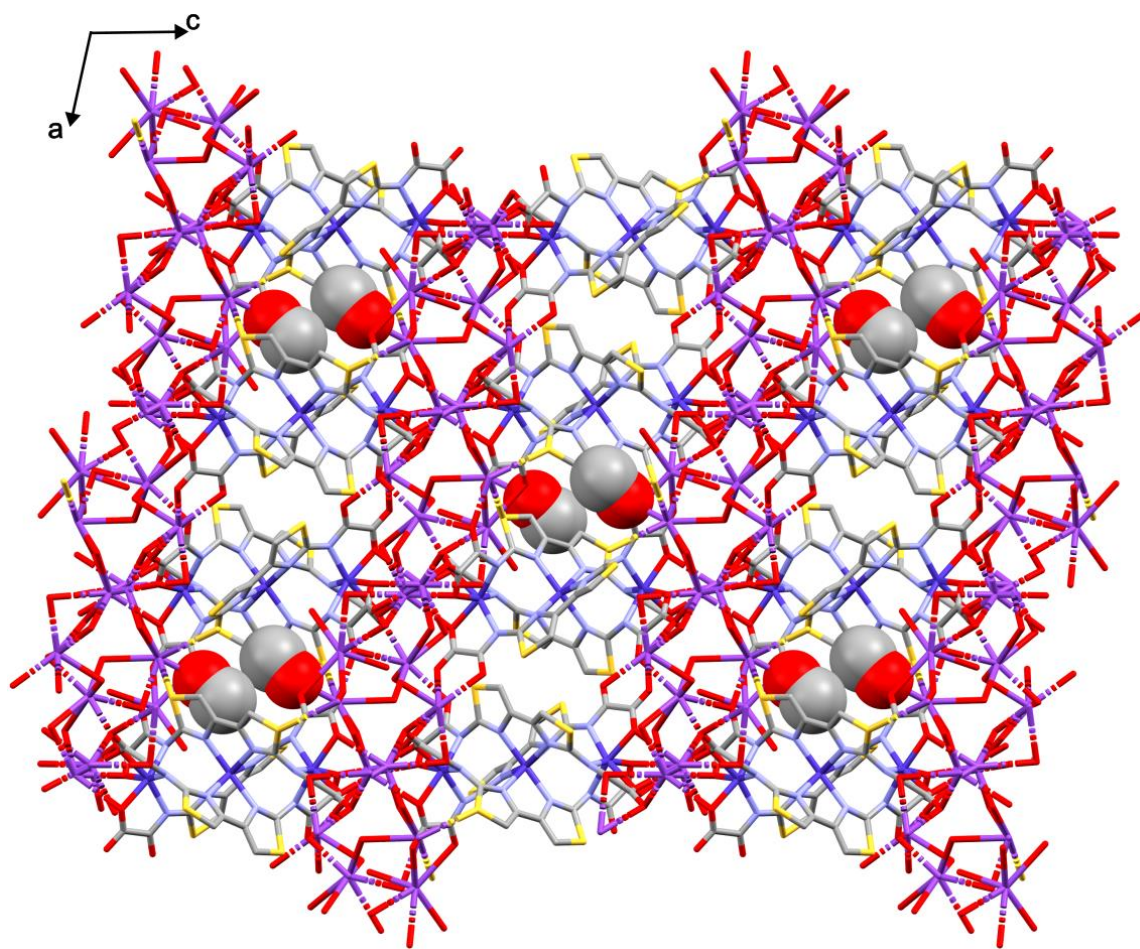

**Figure S6.** Perspective view of the crystal packing of **2** along the crystallographic *b* axis showing the methanol molecules of crystallization as space-filling representation.

## Magnetic Data and Analysis

**Table S5.** Calculated spin configurations and their relative energies as a function of different  $J_i$  constants. The spin configuration used as a reference is the one with the maximum multiplicity generated from the parallel alignment of all local spin moments of the Ni<sup>II</sup> ions. Only the centers with an antiparallel (negative) alignment of their spin moment are noted. The notation in Scheme 2 is used (see main text). When the second-neighbor magnetic couplings are not considered,  $J_2$  terms should be removed.

| Spin configuration | $S$ | $J_1^a$ | $J_2^a$ | Relative energy <sup>a</sup> |
|--------------------|-----|---------|---------|------------------------------|
| {1}                | 1   | 3       | 3       | +7.33                        |
| {2}                | 1   | 6       | 0       | +17.34                       |
| {3}                | 1   | 3       | 3       | +7.33                        |

<sup>a</sup>Values in cm<sup>-1</sup>.

**Table S6.** Energy of the calculated quartet ( $Q_i$ ) and triplet ( $D_i$ ) excited states and their contributions to the  $D$  and  $E$  values for **1** and **2** obtained from CASSCF/NEVPT2 calculations.  $D_{SS}$  is the spin-spin contribution to the axial  $zfs$  parameter, and  $D_T$  and  $D_S$  stand for the sum of spin-orbit contributions coming from quartet and doublet excited states

| Ni1/Ni3        |                     |     |         |         | Ni2            |                     |     |         |         |
|----------------|---------------------|-----|---------|---------|----------------|---------------------|-----|---------|---------|
| State          | Energy <sup>a</sup> | $S$ | $D^a$   | $E^a$   | State          | Energy <sup>a</sup> | $S$ | $D^a$   | $E^a$   |
| $D_{SS}$       |                     | 1   | +0.035  | +0.009  | $D_{SS}$       |                     | 1   | -0.011  | -0.001  |
| $D_T$          |                     | 1   | -4.473  | -0.549  | $D_T$          |                     | 1   | +1.649  | +0.017  |
| $D_S$          |                     | 0   | +0.678  | -0.090  | $D_S$          |                     | 0   | -0.187  | +0.035  |
| T <sub>1</sub> | 10071.8             | 1   | -36.330 | +2.596  | T <sub>1</sub> | 10429.0             | 1   | +20.183 | -20.233 |
| T <sub>2</sub> | 10240.1             | 1   | +20.351 | -20.377 | T <sub>2</sub> | 12916.7             | 1   | +20.358 | +20.304 |
| T <sub>3</sub> | 10673.4             | 1   | +11.519 | +17.252 | T <sub>3</sub> | 12974.9             | 1   | -38.894 | -0.056  |
| T <sub>4</sub> | 16655.8             | 1   | +0.003  | -0.016  | T <sub>4</sub> | 19759.1             | 1   | +0.002  | +0.002  |
| T <sub>5</sub> | 17063.5             | 1   | -0.017  | -0.000  | T <sub>5</sub> | 20006.7             | 1   | +0.000  | +0.000  |
| T <sub>6</sub> | 18010.1             | 1   | +0.003  | -0.003  | T <sub>6</sub> | 21153.7             | 1   | -0.000  | -0.000  |
| T <sub>7</sub> | 27390.5             | 1   | +0.000  | -0.000  | T <sub>7</sub> | 30681.7             | 1   | -0.000  | -0.000  |
| T <sub>8</sub> | 28717.6             | 1   | +0.000  | -0.001  | T <sub>8</sub> | 30968.9             | 1   | +0.000  | +0.000  |
| T <sub>9</sub> | 29102.8             | 1   | -0.002  | +0.000  | T <sub>9</sub> | 31962.6             | 1   | +0.000  | +0.000  |
| S <sub>1</sub> | 16606.7             | 0   | -0.000  | -0.000  | S <sub>1</sub> | 16688.5             | 0   | -0.000  | +0.000  |
| S <sub>2</sub> | 16565.8             | 0   | -0.000  | -0.000  | S <sub>2</sub> | 16689.9             | 0   | -0.000  | -0.000  |
| S <sub>3</sub> | 25924.9             | 0   | +14.350 | -0.044  | S <sub>3</sub> | 26864.9             | 0   | -6.965  | -6.961  |
| S <sub>4</sub> | 26515.6             | 0   | -6.925  | +6.840  | S <sub>4</sub> | 26948.6             | 0   | -6.861  | +6.950  |
| S <sub>5</sub> | 26888.2             | 0   | -6.747  | -6.706  | S <sub>5</sub> | 27119.1             | 0   | +13.639 | +0.046  |

<sup>a</sup>Values in  $\text{cm}^{-1}$ .

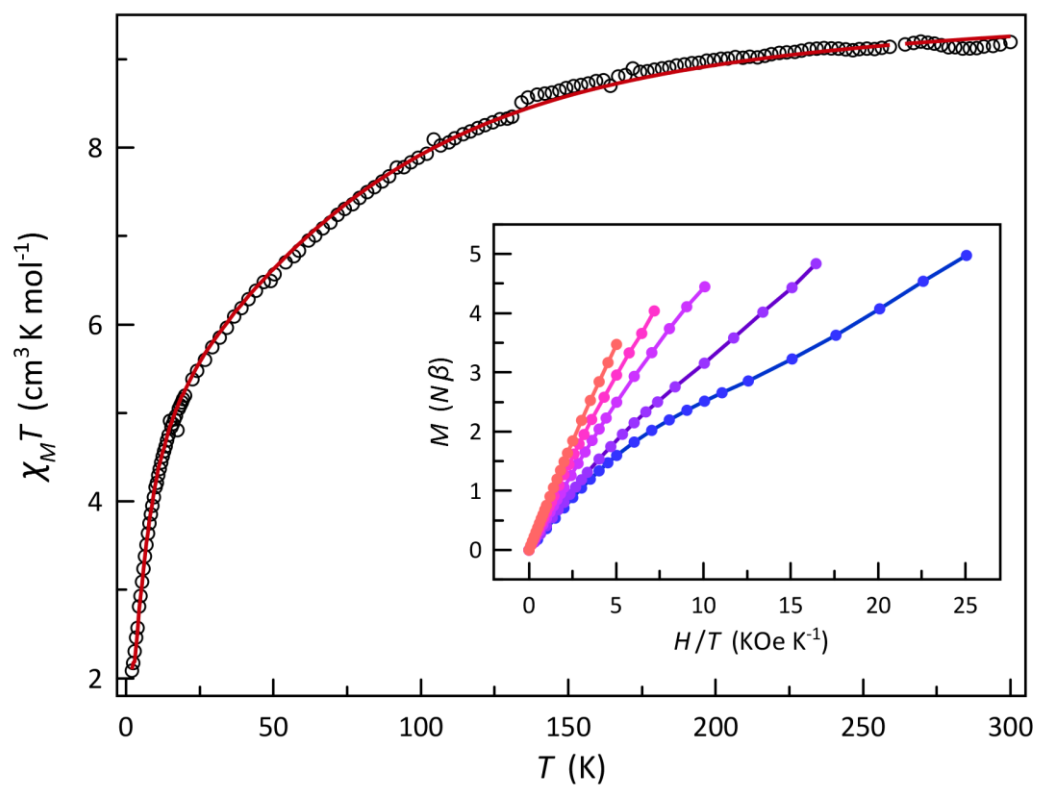

**Figure S7.** Temperature dependence of  $\chi_M T$  for **2**. The solid lines are the best-fit curves. The insets show the  $M$  vs  $H/T$  plot in the temperature range of 2.0–10 K (from blue to red colours). The solid lines are only eye-guides. Originally published by Kalinke *et al.* (reference 24 from the main text).



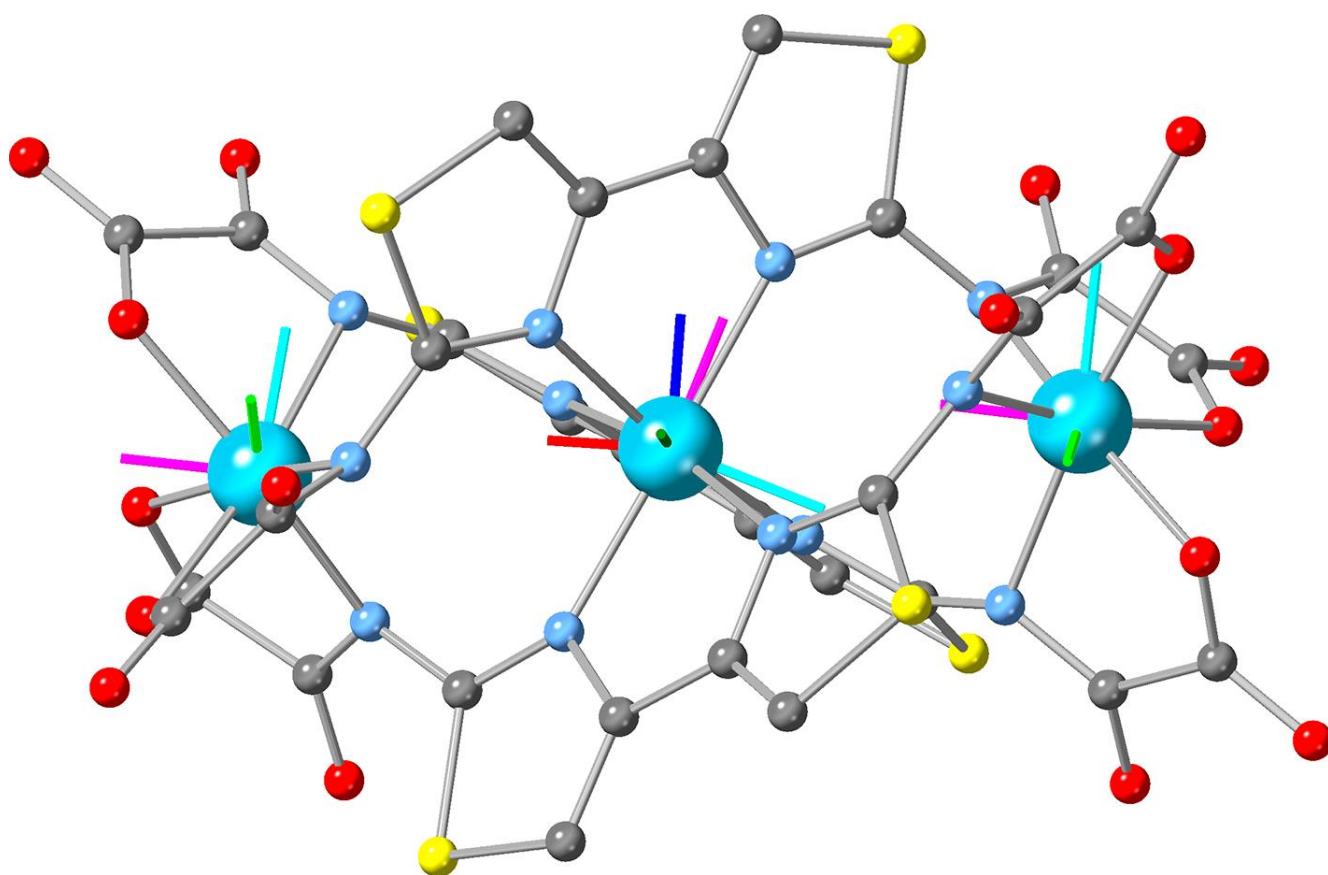

**Figure S8.** Relative orientations of the experimental coordination sphere geometry for the Ni<sup>II</sup> sites in **1**, their calculated local ( $x = \text{cyan}$ ,  $y = \text{green}$ ,  $z = \text{magenta}$ ) and global ( $x = \text{blue}$ ,  $y = \text{dark green}$ ,  $z = \text{red}$ )  $D$  tensors. The global  $D$  tensor was calculated for the  $S = 3$  ground spin state. Color code: light blue (nickel), dark blue (nitrogen); red (oxygen), black (carbon), and yellow (sulphur) Hydrogen atoms were hidden for clarity.
